# Supplementary material for: Safety and Efficacy of Pediatric Sedation Protocols for Painless Diagnostic Examination in A Pediatric Emergency Room of A Single Tertiary Hospital
Source: Research Square preprint supplement (doi:10.21203/rs.3.rs-112956/v1), 2020-12-03
Supplement: Supplementary file 1 [file 65d56f745c84fbad90a0b8cb.docx]

**Safety and efficacy of pediatric sedation protocols for painless diagnostic examination in a pediatric emergency room of a single tertiary hospital**

Junsung Park, MDa; Young-Hoon Byun, MDa; Jeong-Yong Lee, MD, PhDa; Jong Seung Lee, MDb; Jeong-Min Ryu, MD, PhDb; and Seung Jun Choi, MD, PhDa,*

aDepartment of Pediatrics, Asan Medical Center, University of Ulsan College of Medicine, Seoul, Republic of Korea

bDepartment of Emergency Medicine, Asan Medical Center, University of Ulsan College of Medicine, Seoul, Republic of Korea

**Corresponding author:** Seung Jun Choi, MD, PhD

Department of Pediatrics, Asan Medical Center, University of Ulsan College of Medicine, 88 Olympic-ro 43-gil, Songpa-gu, Seoul 05505, Republic of Korea

Tel: 82-2-3010-1644, Fax: 82-2-473-3725, E-mail: sjchoi@catholic.ac.kr

Appendix 1. P values in adverse events between groups by sedation regimen.

|  | Chloral hydrate | Midazolam | Choral hydrate + midazolam | Midazolam + ketamine | Chloral hydrate + midazolam + ketamine |
| --- | --- | --- | --- | --- | --- |
| Chloral hydrate |  |  |  |  |  |
| Midazolam | 0.604 |  |  |  |  |
| Choral hydrate + midazolam | 0.439 | 0.541 |  |  |  |
| Midazolam + ketamine | 1.000 | 1.000 | 0.648 |  |  |
| Chloral hydrate + midazolam + ketamine | 0.719 | 0.545 | 1.000 | 1.000 |  |
